# Supplementary material for: University of Colorado and Black Swift Technologies RPAS-based measurements of the lower atmosphere during LAPSE-RATE
Source: Copernicus journal article supplement (doi:10.5194/essd-2020-333), 2020-12-07
Supplement: Supplementary file [file essd-2020-333-AC1-supplement.pdf]

**Author Responses to Referee and Topical Editor Comments for *essd-2020-333* “University of Colorado and Black Swift Technologies RPAS-based measurements of the lower atmosphere during LAPSE-RATE”**

Referee comments are provided in black font, and author responses are included in blue font. Additionally, we have included a “tracked changes” version of the manuscript at the end of our responses to provide information on what has been changed.

**Anonymous Referee #1**

The authors provide an overview of the data acquired using four different remotely piloted systems operated by University of Colorado and Black Swift Technologies over the one week period of LAPSE-RATE. The article is largely comprised of a general overview of the aircraft and flights that contribute to the dataset referenced in the manuscript. As such, the manuscript provides sufficient detail to understand the contents of the dataset. Although I would have preferred more information about the uncertainty of the measured quantities, the data quality control checks are provided, which provides a broad sense of the data confidence level. I therefore recommend publication in ESSD. However, I do have a few minor comments that the authors may wish to address before publication:

We appreciate the time provided by the reviewer to provide this feedback and improve the quality of the manuscript.

- 1) Little-to-no information is provided about the data acquisition systems used by the aircraft. At the very least, some indication as to the data acquisition rates should be included, particularly given the scatter shown in Figure 7.

We have included data acquisition rate information for all four aircraft in the updated manuscript. Please note that some of the scatter shown in Figure 7 (particularly related to TTwistor winds) was the result of a transition to manual flight. Those data have been removed in the updated version of the figure since these short portions of the flight were substantially more erratic than the autopilot flight, challenging the wind estimation algorithms.

- 2) Corresponding to this point, I would also have liked to have seen some reference to the different response times/frequency response of the sensors. A broad range of sensors are used, and having some knowledge of the time response of the systems relative to the data acquisition rate is important when utilizing the provided data.

We appreciate this request and completely agree that in theory this information would be helpful at times in analyzing the collected data. Having said this, while we could provide some response times as provided by the manufacturers, much of the real response of the measured quantity is a result of the integration onto the airframe. To this end, these characteristics had not been evaluated fully prior to the LAPSE-RATE campaign, and we lack the ability to do so now given the evolution of sensors and aircraft over the last two and a half years. For our current aircraft

platforms we are doing a better job of fully characterizing the performance of the sensors as integrated on different platforms, but unfortunately such details are not available for the equipment as deployed for LAPSE-RATE.

- 3) There is a typo on page 5: "(cite papers)" should be replaced with the relevant citations.

That's embarrassing! The citations have been inserted.

- 4) The winds up to 15 m/s measured by the TTwistor shown in Figure 7 seem quite high. Are these values comparable to the winds measured by other LAPSE-RATE systems? If so, some commentary should be provided as to why they are so much higher than the other aircraft (e.g. Talon) which were measuring at the same time.

Thank you for pointing this out. As had been pointed out in the text, we found that the vast majority of the higher wind speeds measured by the TTwistor occurred during times when the pilot was manually flying the aircraft, almost exclusively right after take-off and right before landing. For clarity, we have removed those points from figure 7. You may note that there are still a few instances of higher wind speeds measured from TTwistor on 7/18. These observations were collected during afternoon "follow-me" legs, where the aircraft was flying through some gusty winds. We have reworded the text that discussed the TTwistor winds to align with how they are now presented.

## **Anonymous Referee #2**

General comments:

The manuscript provides a concise but comprehensive summary of the measurement priorities and methods adopted by one of the teams participating in the unique LAPSE- RATE measurement campaign. The paper provides informative descriptions of the mission (sensing) and operational (performance) capabilities of four remotely piloted aircraft that were used to sample the lower atmosphere over an extended period, targeting a number of science goals enumerated in the text. The paper closes with an overview of sampling times and locations and a summary plot of the data that were collected.

We would like to thank the reviewer for the time that they dedicated to reading through the manuscript and offering suggestions for improvement.

Specific comments:

Following are a few comments that may help improve the paper's impact.

While measurement data are shown in Figure 7, their presentation and analysis is not a primary focus of the paper, so the title is a little bit misleading. Perhaps the title should emphasize "measurement priorities and methods" rather than simply "measurements."

We appreciate this recommendation. However, given that the scope of a data paper as presented in ESSD should specifically not include scientific analysis, we feel that use of the word "measurements" in the current title offers a clear perspective on what is provided in this article (rather than, say, model data). Therefore we would respectfully like to keep the original title.

Table 1 provides a helpful summary of mission (sensing) capabilities. It might be nice to also include a table of operational (performance) capabilities and outcomes (e.g., campaign flight hours, air-relative distance traveled, etc) as well as tasking (e.g., in the context of the measurement priorities listed in Lines 71-75). Much of this information is already provided in the narrative, but a table would facilitate comparisons between platforms.

We appreciate the notion of providing points of comparison between the platforms, and have added the campaign flight hours to Table 1, as recommended. We're not sure what the reader would gain from including the "air-relative distance traveled", as the aircraft covered varying flight patterns. While it might be interesting to compare this, it is difficult to understand how such a number would be used scientifically, and, perhaps easier to understand how it may confuse the reader into thinking that this is the ground distance covered by the aircraft relative to a fixed location. Therefore, we have decided not to include this specific quantity. Additionally, the tasking information is already outlined in the text, and somewhat difficult to succinctly fit into a table.

In providing attribution to Google maps in the captions for Figures 3-6, you might briefly note whether the imagery is consistent with the state of the terrain at the time of the experiments. (E.g., were crops growing as indicated? What was their state of maturity?) This information may be important to someone using the data.

Thank you for this suggestion. We agree that such information would be useful. We did not spend a significant amount of time documenting the environment during the campaign. However, we do provide some details on the meteorological conditions and the general layout and land usage in the San Luis Valley in the overview article that is included in the special issue that will encompass this article. We have added some text to the introduction to point readers to that article if interested in more detail on the sampling environment.

Figure 7 is a nice summary of key data that were collected. The given format is very sensible, with each column depicting a particular measurement variable on a common scale, each row representing the measurements obtained from a given aircraft, and the color map representing the time during the campaign when the data were collected. I might also suggest adopting the same altitude scale for all of the plots, regardless of the platform. This will compress the data for all but the S1, and will generate a lot of white space, but it will also make the rows of data more

directly comparable. For example, one would expect to see a fairly consistent lapse rate slope in the temperature data.

We appreciate this suggestion. Because the altitudes are presented as above ground level (AGL) and all of the platforms operated at different elevations from one another and sometimes even from day to day, it is not clear that the profiles would be any more comparable. We could potentially standardize the altitudes to a common (MSL) scale, but, as the reviewer points out this would result in a lot of white space and also limit the amount of detail visible in the observed quantities. Therefore, after consideration, we have decided to keep the altitude scales as they are.

Technical corrections:

Line 171: An editorial note ("cite papers") still appears in the manuscript.

That's embarrassing! The citations have been inserted.

### **Topical Editor Comments**

The paper summarizes the thermodynamic and kinematic data sets from four fixed-wing platforms operated by the University of Colorado Boulder (UCB) and Black Swift Technologies (BST) in support of the 2018 LAPSE-RATE campaign. Locations, times and flight patterns for each day's observations are presented, along with discussion of data processing and comments from preliminary evaluation.

We very much appreciate the time dedicated by the editor to recommend these edits and support the overall improvement of the manuscript.

pg 1, lines 35-36: references look like they should be 2020c, 2020d, and 2020e (not a, b, and c)

That is correct – thank you for catching this. We have updated the references accordingly.

pg 2, line 62: reference description doublecheck? From the title, the reference is hurricane observation with UAS (Cione), for the text, "to understand turbulence across the world."

This is the correct reference (the Cione manuscript discusses turbulent flux estimation with the Coyote), but we understand the confusion. We updated the text to include a reference to turbulence in tropical cyclones.

pg 2, line 64: there are two Elston 2011 references, but need a and b added (see lines 441 2011a and 447 2011b). Also these Elston refs have an Elston 2015 between them in the listing.

Thank you for catching this. We have added the a and b in the list of references, reordered them to both fall ahead of the 2015 reference, and included the appropriate a and b labels in other locations in the manuscript where 2011 Elston references were included.

pg 3-5, lines 95, 126, 143, 171, and 187 (maybe other places): refer to subplots of Figure 1 as a, b, c, and d. Suggest these letters should be added to the figure.

We have updated the figure to include the letters.

pg 3, line 99: de Boer et al 2018b is not in the ref list (unless it should be 2018).

Thank you for pointing this out – we have removed the “b” from the reference.

pg 4, lines 140-141, 149, others and in Tables 1 and 2: is it standard meteorological notation to us 20 C rather than 20 °C?

We have typically used C instead of °C, but will leave it up to the ESSD editorial and typesetting team to provide information on what is preferable.

pg 5, line 171: “(cite papers)” to be completed

That’s embarrassing! The citations have been inserted.

pg 5, line 183-184: Table 1 is not cited in the text; this might be a good place. Also, here “for accurate calculation of the vertical and horizontal winds.” leaves the reader wanting to know how it is calculated and how accurate. Table 1 indicates “undetermined” for all wind measurements.

We included a reference to Table 1 earlier in the section, pointing the reader towards it in the first paragraph. Regarding the wind, we have not completed a full accuracy assessment of our wind estimation, which is why the table indicates “undetermined”. We have changed the “accurate calculation” statement in lines 183-184 to “fully-informed calculation”, as the alpha and beta angles provided by the probe and the attitude information from the VN-200 offer the full suite of measurements required for wind estimation, as compared to techniques applied to the Talon and DataHawk, which do not carry a MHP.

pg 6, line 198: Should define CU Mobile RPAS Research Collaboratory as MURC for references on pg 7.

We have updated this line to include MURC, and have replaced “RPAS” with “UAS” here, to correctly align with the MURC acronym.

pg 7, line 252: Is “covering approximately 1/3 of the width” centered in the canyon or offset to the West?

We updated the text to reflect an offset. The offset is more towards the northern half of the valley (which generally runs east-west), rather than the western offset referred to by the editor.

pg 8, line270: Suggest adding CoA #s.

We appreciate the suggestion, but are not sure what benefit the reader would gain from including this information, so have not done so.

pg 8, line 292: Should “c1” be b1 here, or are some c1 data sets derived from other c1 data sets?

c1 is correct in this instance – as you state, sometimes it may be that a c1 data product is derived using inputs from another c1 data product.

pg 9. line 299: How are the winds calculated? Is this also by the van den Kroonenberg 2008 reference?

We have included additional information on how the DataHawk autopilot initially calculates the winds, prior to the application of any additional filtering.

pg 9, lines 318-319: Is there a reference with details? Or dissertation?

There is not yet a reference available for this technique, unfortunately.

pg 14, Table 1: This Table is not referenced in the text.

As mentioned above, we have included a reference to Table 1 in section 2.

pg 16, Figure 1: Text calls out Figure 1a, etc., so add a, b, c, and d here in caption or sub-images.

As mentioned above, we have added A-D in the image.

pg 21, Figure 6 left plot: The yellow color is not visible here (ok in Figure 7, though, with more density).

Interesting – it does show up well on my end. I would like to keep it if possible (currently consistent with Figure 2, but can update it if the typeset version is not visible for some reason.

pg 22, Figure 7: With 12 subplots, multiple days, number of flights and the range of the altitude scales, the surface temperature effects described in the paper are difficult for the reader to discern. Could these be pulled out with a zoomed altitude scale in a separate figure?

Consistent with the scope of an ESSD article, we are simply attempting to provide an overview of the observations collected. While we could produce another figure with a consistent zoomed in altitude scale in the lower atmosphere, we fear that justification for doing so would then require

additional analysis of the observations in that area, which, in turn would like extend beyond the scope of what should be included with a data paper. One of the reviewers recommended making the altitude scales the same for these figures, though doing so would make it difficult to see some of the limited details currently visible. Additionally, since the altitudes are all AGL and the flight start elevations were different from platform-to-platform and day-to-day, it is not clear to us that standardizing them would be beneficial to the reader. Therefore, we would like to keep this figure as is.

pg 22, Figure 7: Also, the AGL scale in Figure 7 overlays measurements from different locations with different MSL altitudes. Perhaps a comment relating this in the text or caption should be added?

Thank you for this suggestion – we have included a sentence to the figure caption to indicate that the ground level is different for different platforms (and even for different flights for the same platform).

# University of Colorado and Black Swift Technologies RPAS-based measurements of the lower atmosphere during LAPSE-RATE

5 Gijs de Boer<sup>1,2</sup>, Cory Dixon<sup>3\*</sup>, Steven Borenstein<sup>3</sup>, Dale A. Lawrence<sup>3</sup>, Jack Elston<sup>4</sup>, Daniel Hesseliuss<sup>5</sup>, Maciej Stachura<sup>4</sup>, Roger Laurence III<sup>3#</sup>, Sara Swenson<sup>3</sup>, Christopher M. Choate<sup>3</sup>, Abhiram Doddi<sup>3</sup>, Aiden Sesnic<sup>3</sup>, Katherine Glasheen<sup>3</sup>, Zakariya Laouar<sup>3</sup>, Flora Quinby<sup>3</sup>, Eric Frew<sup>3</sup> and Brian M. Argrow<sup>3</sup>

10 <sup>1</sup> Cooperative Institute for Research in Environmental Sciences, University of Colorado Boulder, Boulder, Colorado USA

<sup>2</sup> Physical Sciences Division, National Oceanic and Atmospheric Administration, Boulder, Colorado, USA

<sup>3</sup> Department of Aerospace Engineering, University of Colorado Boulder, Boulder, Colorado USA

<sup>4</sup> Black Swift Technologies, Boulder, Colorado, USA

<sup>5</sup> Office of Integrity, Safety, and Compliance, University of Colorado Boulder, Boulder, Colorado, USA

\* Current Affiliation: Geotech Environmental Equipment, Denver, Colorado, USA

# Current Affiliation: Ball Aerospace & Technologies Corporation, Boulder, Colorado, USA

20 *Correspondence to:* Gijs de Boer (gijs.deboer@colorado.edu)

**Abstract.** Between 14 and 20 July 2018, small remotely-piloted aircraft systems (RPAS) were deployed to the San Luis Valley of Colorado (USA) together with a variety of surface-based remote and in-situ sensors, and radiosonde systems as part of the Lower Atmospheric Profiling Studies at Elevation – a Remotely-piloted Aircraft Team Experiment (LAPSE-RATE). The observations from LAPSE-RATE were aimed at improving our understanding of boundary layer structure, cloud and aerosol properties and surface-atmosphere exchange, and provide detailed information to support model evaluation and improvement work. The current manuscript describes the observations obtained using four different types of RPAS deployed by the University of Colorado Boulder and Black Swift Technologies. These included the DataHawk2, the Talon and the TTwistor (U. of Colorado) and the S1 (Black Swift Technologies). Together, these aircraft collected over 30 hours of data throughout the northern half of the San Luis Valley, sampling altitudes between the surface and 914 m AGL. Data from these platforms are publicly available through the Zenodo archive, and are co-located with other LAPSE-RATE data as part of the Zenodo LAPSE-RATE community (<https://zenodo.org/communities/lapse-rate/>). The primary DOIs for these datasets are 10.5281/zenodo.3891620 (DataHawk2, de Boer et al., 2020a), 10.5281/zenodo.4096451 (Talon, de Boer et al., 2020b), 10.5281/zenodo.4110626 (TTWISTOR, de Boer et al., 2020c), and 10.5281/zenodo.3861831 (S1, Elston and Stachura, 2020).

Deleted: b

Deleted: c



## 1 Introduction

45 During the summer of 2018, the University of Colorado, along with the Earth System Research Laboratory (ESRL) of the National Oceanic and Atmospheric Administration (NOAA) and National Center for Atmospheric Research (NCAR) hosted the annual meeting for the International Society for Atmospheric Research using Remotely-piloted Aircraft (ISARRA; de Boer et al., 2019a). Along with this conference the organizers set up a “flight week”, where participating groups could conduct remotely-piloted aircraft system (RPAS) flights in a coordinated manner to make scientifically relevant measurements of the lower atmosphere. This campaign, titled “Lower Atmospheric Profiling Studies at Elevation – a Remotely piloted Aircraft Team Experiment” (LAPSE-RATE, de Boer et al., 2020a; 2020b) brought together a variety of teams to Colorado’s San Luis Valley for a week of atmospheric science-centric RPAS operation. A summary of the LAPSE-RATE campaign, [including an overview of meteorological conditions and the San Luis Valley sampling environment](#), is provided in an overview paper at the beginning of this special issue (de Boer et al., 2020b).

55 As a part of the LAPSE-RATE effort, a team of participants from the University of Colorado Boulder (CU) and Black Swift Technologies (BST) contributed a week of time and RPAS and ground-based equipment. These teams, originating in CU’s Integrated Remote and In-Situ Sensing (IRISS) grand challenge project, the Cooperative Institute for Research in Environmental Science (CIRES), and the Department of Aerospace Engineering’s Research and Engineering Center for Unmanned Vehicles (RECUV), consisted of a combination of scientists, engineers and students, and leveraged the technology and expertise developed over a variety of previous successful RPAS-based atmospheric science deployments conducted by the University of Colorado. These include development of equipment and execution of field campaigns to better understand the thermodynamic and dynamic environments around supercell thunderstorms (Koch et al., 2018; Frew et al., 2012; Houston et al., 2012), extensive operation of RPAS at high latitudes (de Boer 2019b; de Boer et al., 2019c; de Boer et al., 2018; de Boer et al., 2016; Cassano et al., 2016; Cassano, 2014; Intrieri et al., 2014; Knuth et al., 2013) and the use of these platforms to understand turbulence [around the world, including in tropical cyclones](#) (Cione et al., 2019). Similarly, BST has an extensive background of conducting RPAS operations for environmental science as evidenced by a variety of studies and synthesis papers (Elston et al., 2015; Elston et al., 2011a; Elston et al., 2011b). This experience has resulted in a variety of innovative operational modes, including a roaming flight pattern called “follow me”, in which the aircraft is trained to follow a flight pattern centered on a moving vehicle. This pattern provided insight into spatial gradients across the valley, as discussed later.

Deleted: across

For the LAPSE-RATE campaign, the CU and BST teams were interested in contributing to all of the science goals connected to the campaign, including:

- 75
- Convective initiation
  - The morning boundary layer transition
  - Density currents and drainage flows
  - Aerosol properties
  - Sensor and platform intercomparison work

80

CU/BST participation included a significant number of participants (>15), several operations vehicles, over 10 unmanned aircraft, and a mobile atmospheric observatory, command/control center, and computing facility (see de Boer et al., 2020f). The next section provides an overview of the RPAS deployed, including information on the platforms and the sensors they carried, and the unique capabilities offered by each. Section 3 provides insight into the sampling that was completed, including information on measurement locations, the types of weather conditions sampled, general details on flight strategies, statistics summarizing the flights and data collected, and information on interesting events sampled. Section 4 provides an overview of data processing and quality control, while section 5 offers insight into data availability (and DOIs). Finally, we summarize the paper and dataset and provide information on contributions of authors, funding sources, and collaborators.

90

## 2 Overview of Platforms and Sensors

95

During LAPSE-RATE, CU and BST operated a combination of six different RPAS types. [An overview of these systems is provided in Table 1.](#) These range from commercially-available airframes with open-source autopilot systems to custom systems entirely designed, developed and constructed at CU and BST. In this section, we provide an overview of the different aircraft and the sensors carried by each.

100

One of the CU aircraft with the most amount of flight time during LAPSE-RATE was the DataHawk2 platform (Figure 1a). This system, developed and designed entirely within RECUV, consists of a lightweight (< 1 kg take-off weight), 1.2 m fixed-wing foam pusher-prop aircraft, with custom autopilot system and sensor suite. Capable of approximately 45 minutes of flight with a standard battery configuration and featuring a cruise speed of 14-16 m s<sup>-1</sup>, the DataHawk2 has a theoretical range of approximately 40 km. It has operated in a variety of environments, including the high Arctic (de Boer et al., 2018; de Boer et al. 2019b), Asia (Kantha, et al., 2017), and South America (Scipi3n et al., 2016). The DataHawk2's relatively slow flight speed (14 m/s, burst up to 22 m/s) allows the platform to obtain measurements at high spatial resolution when compared to other aerial vehicles making it ideal for studies of atmospheric turbulence at fine scales (e.g. Kantha et al., 2017; Balsley et al., 2018). Despite this relatively slow speed, the DataHawk2 has been operated in winds up to 12 m/s, making it a robust research platform for the harsh Arctic environment. The aircraft is capable of autonomous operation, although most flights (including all of the LAPSE-RATE flights) are completed under a remote-pilot scenario where the aircraft is guided and monitored using a computer ground station.

105

110

The DataHawk2 collected 8.84 hours of data during LAPSE-RATE.

115

The DataHawk2 system carries a variety of sensors for measuring atmospheric and surface properties. Custom-built instrumentation includes a fine wire sensor array employing two cold- and one hot-wire. These fine wires offer high-frequency (800 Hz) information on temperature and fine scale turbulence. High bandwidth is enabled by small surface-area-to-volume ratios of very thin (5 μm diameter) wires. In addition to the finewire array, the DataHawk2 carries custom electronics that include integrated-circuit slow response sensors (Sensiron SHT-31) for measurement of

Deleted: b

temperature through a calibrated semiconductor, and relative humidity using a capacitive sensor. To measure surface and sky brightness temperatures, DataHawk2s are equipped with up- and downward-looking thermopile sensors (Semitec 10TP583T with custom electronics). To provide additional information on thermodynamic structure, DataHawk2s have also carried the commercially-available iMet1 radiosonde package, providing comparative information on position (GPS), temperature (bead thermistor), pressure (piezoresistive) and relative humidity (capacitive), as well as the Vaisala RSS421 sensor that is similar to the sensor suite used for the popular RS-41 radiosonde. However, neither the iMet1 nor RSS421 were installed during LAPSE-RATE. Finally, to estimate winds using the DataHawk2, information from the onboard GPS, Pitot tube and inertial measurement unit (IMU) are integrated to calculate all three wind vectors. This calculation is completed using equations presented in van den Kroonenberg (2008), under the assumption that the aircraft instantly reacts to perturbations in the local wind vector, meaning that the sideslip angle ( $\beta$ ) is assumed to be zero and that the angle of attack ( $\alpha$ ) is set to be equal to the mean pitch of the aircraft in level flight. These sensors are logged at a variety of different acquisition rates. Specifically, the finewire measurements were logged on board the aircraft at 800 Hz, while other variables were logged at 100 Hz. All data are interpolated to a common 10 Hz clock in the archived LAPSE-RATE datasets.

In addition to the DataHawk2, CU collaborated with BST to operate a Black Swift S1 RPAS (Figure 1b) during LAPSE-RATE. This platform was originally designed as an advanced, fully autonomous survey and mapping platform. Equipped with the Black Swift Technologies SwiftCore flight management and autopilot system, remote operation and flight planning is done from a tablet. Take-off is performed through non-assisted hand launches, and the advanced landing algorithm provides for robust and precise autonomous belly landings. The aircraft has a 1.7 m wingspan and a gross take-off weight of 2.5 kg. When operated with a 13,600 mAh LiPo battery, it allows for an endurance of up to 1.5 hours at a cruise speed of  $17 \text{ m s}^{-1}$ , depending on the mission profile and environmental conditions. The aircraft has a high operational ceiling and has been used to perform mapping missions at altitudes up to 14,000 feet in Colorado. It has been employed for surveying work, land management, crop damage assessments, and large area ecological studies. During LAPSE-RATE, the S1 was equipped with the Black Swift Technologies Multihole Probe (BST MHP). This probe includes five pressure ports to measure the system's airspeed, angle of attack and sideslip angle that can be combined with information from an INS and GPS to provide estimates of the horizontal and vertical wind speed and direction. The BST MHP includes an integrated E+E Elektronik EE-03 sensor for environmental humidity and temperature. This sensor has a stated accuracy of  $\pm 3\%$  relative humidity for environmental conditions between 10-100% RH and a temperature accuracy of  $\pm 0.3 \text{ C}$  at an ambient temperature of  $20 \text{ C}$ . All data collected using the S1, with the exception of the temperature and humidity were logged at 100 Hz. The temperature and humidity values were logged at 4 Hz. The S1 collected 10.13 hours of data during LAPSE-RATE.

Beyond the DataHawk2 and S1, CU operated two other aircraft on a more limited basis. The first of these was the X-UAV Talon RPAS (Figure 1c). These systems are small (1.7 m, 3 kg) airframes made of EPO foam and were outfitted with the PixHawk2 autopilot system running the open source Ardupilot Plane software. For LAPSE-RATE, the Talons were set up to fly for approximately 45 minutes on a single battery at a cruise speed of  $18 \text{ m s}^{-1}$ . As with the

155 DataHawk2, this relatively slow flight speed provides high resolution measurements from the custom payload that  
was flown on this platform. The Talons operated for LAPSE-RATE carried a Vaisala RSS904 sensor (similar sensor  
module to that used in the Vaisala RS-92 radiosonde) to make measurements of temperature, pressure and humidity.  
The RSS904 features a capacitive wire temperature sensor with a 0.1 C resolution, a thin-film capacitor humidity  
160 sensor with a resolution of 1 %, and a silicon pressure sensor with a measurement resolution of 0.1 hPa, and expected  
accuracies of 0.2 C, 2% and 0.4 hPa, respectively, in temperature, RH and pressure. The Talon collected 4.2 hours of  
data during LAPSE-RATE.

The RSS904 sensor suite was integrated into a custom 3D-printed nosecone. In addition to measurements from the  
RSS904, wind speed and direction were estimated by the autopilot system, using a combination of the GPS velocities,  
aircraft attitude measurements from the inertial navigation system and aircraft airspeed. Aircraft navigation data were  
165 logged at 10 Hz, while the pressure, temperature, and humidity values from the RSS904 were logged at 2 Hz. For a  
limited number of Talon flights, the aircraft carried a “microsonde” custom temperature, pressure and humidity sensor  
suite developed at CU. The microsonde was developed to be integrated into a Lagrangian drifter called the  
Driftersonde (Swenson et al., 2019) that could be launched from small RPAS for atmospheric research. The  
microsonde includes a MS8607 PTH sensor from TE Connectivity, which consists of a piezoresistive pressure sensing  
170 element, which measures both barometric pressure and temperature. The piezoresistive Micro-Electro-Mechanical  
Systems (MEMS) measure atmospheric pressure relative to a vacuum inside the MEMS, sealed by a thin membrane.  
A Wheatstone bridge logs temperature by measuring the temperature-dependent resistance. Additionally, the MS8607  
includes a capacitive sensing element that features a dielectric polymer film, sensitive to humidity, between two  
electrodes to measure relative humidity. In addition to the MS8607, the microsonde includes a CAM-M8Q GPS  
175 module (ublox) that provides reception of up to 3 global navigation satellite systems (GNSS) (GPS, Galileo,  
GLONASS, BeiDou) at a given time. The integration of the microsonde on the Talon during LAPSE-RATE was, in  
part, to provide a dataset to allow for direct comparison between the measurements it produced to those from the  
RSS904, which is considered to be an industry standard sensor suite. Microsonde data were logged at 1 Hz.

180 Finally, the other aircraft operated by CU that saw limited action during LAPSE-RATE was the TTwistor RPAS  
(Figure 1d). The TTwistor is based on an earlier, proven design, the Tempest (Elston et al., 2011b; Roadman et al.,  
2012), which was deployed extensively to study severe weather in the midwestern United States. The TTwistor is a  
dual-motor RPAS capable of completing up to three hours of continuous flight operations with an 18,000 mAh high-  
voltage Lithium Polymer (Li-HV) battery pack. This results in a range of 120-240 km, depending on operational  
185 mode and flight pattern, at a typical cruise speed of 28 m s<sup>-1</sup>. Additionally, the aircraft was designed to be capable of  
a fast (40+ m s<sup>-1</sup>) dash speed to allow it to get out of situations with strong winds around convective storms. The  
aircraft carries a PixHawk autopilot system for autonomous navigation between GPS coordinates and remote operation  
by a ground pilot. For LAPSE-RATE the TTwistor carried a payload consisting of a multi-hole pressure probe (MHP)  
from Aeroprobe Corporation, a VectorNav VN-200 inertial navigation system (INS), and a Vaisala RSS904 pressure,  
190 temperature and humidity sensor system. The VN-200 has a stated dynamic accuracy of 0.1 degrees (RMS) in pitch  
and roll measurements and 0.3 degrees (RMS) in magnetic heading. Additionally, it features a stated 2.5 m (5.0 m)

Deleted: cite papers

accuracy in horizontal (vertical) position and  $0.05 \text{ m s}^{-1}$  accuracy in velocity. In combination the airspeed, angle of attack and sideslip angles from the MHP and attitude and ground-relative velocity information from the VN-200 allow for ~~fully-informed~~ calculation of the vertical and horizontal winds. ~~VN-200 data were logged at 50 Hz, MHP data were logged at 100 Hz, and the RSS904 variables were logged at 2 Hz.~~

Deleted: accurate

The extended endurance of the TTwistor, along with advanced implementation of autopilot capabilities and a surface tracking vehicle (Figure 1d) allows this platform to be deployed in a “follow-me” mode. In this mode of operation, the flight team is inside of a moving vehicle and the aircraft is programmed to stay within a given distance of the vehicle while in flight. This allows for the execution of extended horizontal transects for collection of data on spatial variability and gradients. Follow-me has been used to make measurements of outflow boundaries associated with severe storms, and during LAPSE-RATE was implemented to attempt to better understand the influence of surface heterogeneity on the overlying atmospheric state. The TTwistor collected 7.49 hours of data during LAPSE-RATE.

### 3 Description of measurement locations, flight strategies and completed flights/sampling

Over the course of the one-week LAPSE-RATE campaign, the platforms described above conducted flights over a variety of different areas to collect atmospheric data (Figure 2). All of the aircraft involved conducted flights alongside the CU Mobile ~~JAS~~ Research Collaboratory (MURC; de Boer et al., 2020f) at Leach Airport (37.79 N, 106.05 W) to allow for intercomparison of platforms and sensors. Unfortunately, the data from the Talon and TTwistor were not processed in time to be included in the formal intercomparison conducted through this effort (Barbieri et al., 2019).

Deleted: RPAS

Besides the limited flights conducted at Leach Airport, the remainder of the CU DataHawk2 LAPSE-RATE operations were conducted at a farm site in the western part of the San Luis Valley (approximately 37.86 N, 106.18 W, 2326 m above mean sea level (MSL)) near the intersection of County Road J and State Route 45 (see Figure 3). This site featured large crop circles, each having different states of irrigation and plant activity. At this site, two primary flight modes were employed. The first of these was a basic profiling mode, where the aircraft conducted repeated vertical ascents and descents while following an orbital flight track. These flights were designed to evaluate the development of the boundary layer and temporal evolution of its structure during the morning hours. Profiles typically ranged between the surface and 500 m above ground level (AGL). In addition to these profiling flights, additional emphasis was placed on attempting to measure differences in boundary layer development over different surface types, mainly between crop circles with different amounts of plant coverage and irrigation levels. For those flights, the aircraft were operated in a loiter pattern over two different crop circles for extended time periods.

With the exception of 19 July, the BST S1 was operated at the mouth of the Penitente Canyon, just to the north of the intersection between routes 38A and 40G (37.84 N, 106.27 W, 2400 m MSL) (Figure 4). At this location, the aircraft conducted nearly continuous profiling flights between the surface and approximately 800 m AGL. Flights were almost exclusively conducted in the morning and early afternoon (local time) hours. Flights on 19 July were conducted just

235 to the north of the town of Villa Grove, Colorado off of private property located off of County Road 57 at the end of  
an old air strip (38.27 N, 105.94 W, 2415 m MSL). These flights included a series of stepped racetracks between two  
points situated across a valley from one another and were designed to measure density-driven cold-air drainage flow  
into the main San Luis Valley. Flight altitudes for these drainage-flow flights spanned between the surface and  
approximately 350 m AGL.

240 The Talon conducted scientific flight operations on July 18-19 in two different locations, as shown in Figure 5. Flight  
operations on 18 July were conducted at Leach Airport, and included three profiling patterns to approximately 700 m  
AGL. These flights were meant to capture temporal variability of boundary layer structure and extend the vertical  
extent of the MURC measurements obtained at that location. Additionally, these flights offered an opportunity to  
compare the Talon observations with those from the MURC instrumentation tower, and some time was spent at the  
end of each flight operating at lower altitudes in proximity to the MURC. On 19 July, the Talon conducted six research  
245 flights in the Saguache Canyon starting around 06:15 local time, with operators perched above the valley floor off of  
County Road Cc36 (approximate location 38.105 N, 106.242 W). From here, the Talon was flown in a stepped  
racetrack pattern across the valley to the north-northeast, covering approximately 2 km of horizontal distance and  
transitioning between different altitudes at the conclusion of each racetrack to attempt to map out the spatial extent of  
the valley drainage flow. This included sampling at eight different altitudes, ranging between 350 and 30 m AGL,  
with the first six altitudes separated by 50 m and the last one by 20 m.

250 Finally, the TTwistor was operated in two different modes during the LAPSE-RATE campaign, with flight locations  
illustrated in Figure 6. On 18 July, the aircraft conducted flights in “follow-me” mode, where the aircraft operators  
are positioned in a vehicle-based mobile ground station. Under this mode of operation, the aircraft conducted  
extensive horizontal transects from Leach Airport through the eastern half of the San Luis Valley. These flights  
255 included sampling at various altitudes and were designed to document spatial variability between the more agricultural  
portions of the valley and the dry eastern shrubland. In total, three “follow-me” flights were conducted, with the  
earliest of these taking the aircraft directly south of Leach Airport, before completing an easterly transect and returning  
back to the north. The second “follow-me” flight took the aircraft further to the east, and included a north-south leg  
approximately  $\frac{1}{4}$  and  $\frac{3}{4}$  of the way through the flight. The third flight followed a similar route to the second. In  
260 general, the first half of these “follow-me” flights were conducted at approximately 300 m AGL, with the second half  
conducted at approximately 120 m AGL. In addition, the first flight also included a short sampling period at  
approximately 25 m AGL to foster comparison with the MURC tower. On 19 July, the TTwistor operated from the  
western end of the Saguache Airport to conduct coordinated sampling of cold-air drainage in the Saguache Canyon.  
From there, the aircraft conducted three flights in which it stepped through altitudes between 45 and 270 m AGL in  
265 45 m increments, while operating in a large orbit. The large orbit was meant to capture spatial variability of the  
drainage flow within the width of the canyon, with the aircraft covering approximately  $\frac{1}{3}$  of that width in the northern  
portion of the valley. Flights on the 19<sup>th</sup> were initiated at around 06:00 local time (MDT) in order to capture the most  
intense portions of the drainage flow, which begins to taper off with solar heating of the surface.

270 Some of the primary measurements from these platforms and the flights conducted during LAPSE-RATE are included  
in Figure 7. These figures show similar observations from the different platforms, with some notable exceptions.  
First, the S1 shows an influence of heating of the temperature sensors while the aircraft is on the ground. Because of  
this heating, the S1 temperature sensor provides excessive temperature readings for the first portion of the flight,  
275 resulting in super-adiabatic lapse rates extending from the surface to around 100 m altitude. This is resolved after the  
aircraft has been in the air for several seconds. The DataHawk2 slow temperature sensor shows similar structures, but  
their prevalence is greatly reduced if analyzing the coldwire (fast) temperature measurement. Notably, both of these  
platforms have some variability near the surface that is likely to be a result of measurement error there, rather than  
atmospheric features near the surface. In addition to these near-surface features, it is also notable that the TTwistor  
has more variability in its measured wind speed than the other platforms. ~~Data shown in Figure 7 do not include those  
280 collected during manual flight of the aircraft, eliminating the possibility of this factor impacting the estimated winds.  
The TTwistor was flown somewhat later in the day during the 18<sup>th</sup> of July, and traversed a significant area during its  
“follow-me” flight operations. During these afternoon flights, the aircraft passed through several areas of gusty winds.  
While the exact cause for these winds is not determined, we speculate that they were associated with outflows from  
large convective eddies and the significant thermal gradients established in the valley due to the variability of solar  
285 exposure and surface land cover. The latter variability is noticeable in the specific humidity data shown in Figure 7  
as well.~~

**Deleted:** substantially  
**Deleted:** It is possible that some of this is the result of measurement error, though it is important to note that the largest excursions are generally associated with flight towards the end of the flight, was completed under manual pilot control and is therefore less stable than the autopilot-controlled flight period.  
**Formatted:** Superscript

Flight operations conducted by CU and BST were completed under Certificates of Authorization issued by the US  
Federal Aviation Administration (FAA). These COAs were developed to support the safe operation of these platforms  
290 to 914 m AGL, including alongside a moving control station.

#### 4 Data Processing and Quality Control

As discussed in de Boer et al. (2020b), LAPSE-RATE data files are provided in NetCDF format with a common file  
name structure. This common structure (xxx.ppppp.lv.yyyymmdd.hhmmss.cdf) provides information on the institute  
295 generating the data (xxx), the platform used to collect the data (ppppp), the level of data processing (lv), and the date  
and time that the measurements were obtained. The institutions covered in the current paper include the University  
of Colorado Boulder (UCB) and Black Swift Technologies (BST), with platform identifiers including the DataHawk  
2 (DATHK), the S1 (BSTS1), the Talon (TALN3) and the TTwistor (TWSTR).

300 The teams provided different levels of processing and quality control for the measurements from these platforms.  
Processing of the DataHawk2, Talon and TTwistor resulted in files at the b1 level. The S1 files were only processed  
to the a1 level. Similar limits were applied to all three UCB datasets to provide a b1 level dataset. These values were  
selected as physical limits that should not be exceeded for data collected during LAPSE-RATE, and are reviewed in  
Table 2. As a reminder, the levels that were defined for LAPSE-RATE in general included:

305 **a0:** Raw data converted to netCDF

- a1: Calibration factors applied and converted to geophysical units
- b1: QC checks applied to measurements to ensure that they are “in bounds”. Missing data points or those with bad values should be set to -9999.9
- c1: Derived or calculated value-added data product (VAP) using one or more measured or modeled data (a0 to c1) as input

320 Processing of the DataHawk data included calibration of the coldwire temperature and calculation of the winds. The coldwire voltages were calibrated against temperatures derived from the SHT sensor. This relationship is expected to be linear and the calibration relationship is derived using a first-order polynomial fit. This fit is calculated on a flight-by-flight basis, leveraging temperature measurements from parts of the dataset that were collected while the aircraft was in flight. In addition, the first 1000 datapoints (100 s at 10 Hz) are also omitted from this calculation to avoid contamination from the surface heating of the temperature sensor discussed earlier. DataHawk2 winds are calculated by leveraging observations from the pitot tube, the GPS, and the onboard inertial measurement unit (IMU). Leveraging information from these sensors, the autopilot computes wind in inertial coordinates as the vector difference of the velocity of the vehicle relative to the ground, minus the velocity of the vehicle relative to the air. The later vector is estimated in magnitude as the airspeed from the pitot-static sensor, and in direction as the orientation of the vehicle longitudinal axis in inertial coordinates. This assumes that the vehicle is pointed into the relative wind (i.e. with only small deviations in sideslip and angle of attack), which is thought to be a good assumption for wind variations with timescales longer than about 1 sec for a vehicle of this scale. Because the DataHawk2 winds calculated from these sensors include a periodic signal that corresponds to the frequency of an orbital circle, additional filtering is applied to these winds. This technique applies a 15<sup>th</sup> order low pass infinite impulse response (IIR) filter to the originally calculated winds to produce a smoothed version. Additionally, using yaw data from the autopilot, the mean wind is calculated over any single orbit. Finally, the high-frequency component of the originally calculated winds (difference between the calculated wind and the output from the lowpass filter) is added back to the wind calculated across the orbital means. As a result, these wind estimates are meant to primarily provide perspective on the mean wind structure with altitude, in addition to the higher frequency turbulent structure.

340 The Talon and TTwistor data also require the calculation of wind components. For both datasets, winds are calculated using formulae available in van den Kroonenberg et al. (2008). This technique takes input from the onboard GPS, IMU and airspeed sensor to calculate three-dimensional wind components. The TTwistor carried a multihole pressure probe to measure angle of attack and sideslip angles, while the Talon only carried a standard Pitot tube for estimating airspeed. As a result the Talon angle of attack and sideslip were estimated to be a constant 1.75 degrees and 0 degrees, respectively, for the entire flight. This assumption results in the omission of fine turbulent motion that would not be captured without understanding of the angle of airflow over the airspeed sensor. For both platforms, a series of corrections are applied to account for offsets in the calculated true airspeed (TAS), and potential angular offsets between the IMU and the airspeed sensor (yaw and pitch offsets). These offsets are calculated in an iterative manner

Formatted: Font Alignment: Auto

Formatted: Font: Times New Roman, 10 pt

Deleted:

Formatted: Font color: Auto



350 by minimization of the variance of the calculated winds with an order of TAS, pitch, yaw, TAS and yaw. The last  
355 two TAS and yaw corrections are applied to apply a finer scale correction than possible in the first round.

## 5 Data Availability

355 The data files from the LAPSE-RATE project are generally being archived under a LAPSE-RATE community  
established at the Zenodo data archive (<https://zenodo.org/communities/lapse-rate/>). From here, LAPSE-RATE  
observations are available for public download and use. Data Object Identifiers (DOIs) were automatically generated  
by the Zenodo archive at the data version and product level. Data from the different sources described above are  
360 posted as individual datastreams on the archive, with each of the platforms described in the previous section having  
their own DOI. It is important to note that each platform may have several different levels of data available. Therefore,  
data products with different levels of processing and quality control may be provided with separate DOIs. This means  
the files and data described in this publication are spread across a variety of DOIs, and that additional DOIs could be  
created in the future that include LAPSE-RATE data, as additional data products are developed.

365 As of the writing of this manuscript, the CU DataHawk2 dataset (de Boer et al., 2020c) is available at Zenodo.org  
(<https://zenodo.org/record/3891620#.X48psy9h1dA>) under DOI <http://doi.org/10.5281/zenodo.3891620>. This  
version 2.0 of this dataset includes both a1 and b1 level files, with the b1 files featuring additional quality control and  
processing of wind data, as described in section 4 above. Data from the CU Talon aircraft includes three versions (de  
Boer et al., 2020d). The original version had some issues with file names and the timestamp that was included in the  
370 files, which have been fixed in subsequent versions. Therefore, users should use the latest available version (currently  
3.0), which is available at Zenodo.org (<https://zenodo.org/record/4096451#.X48xYy9h1dA>) under  
<http://doi.org/10.5281/zenodo.4096451>. The CU TTwistor data (de Boer et al., 2020e) are also available at  
Zenodo.org (<https://zenodo.org/record/4110626#.X48xsC9h1dA>) under DOI <http://doi.org/10.5281/zenodo.4110626>.  
As with the Talon data, there are multiple versions, and the most current version as of the writing of this manuscript  
375 is 3.0. Finally, the BST S1 datasets (Elston and Stachura, 2020) are also available at Zenodo.org  
(<https://zenodo.org/record/3861831#.X48x4i9h1dA>) under DOI <http://doi.org/10.5281/zenodo.3861831>, with the  
most current version being 1.1.

## 6 Summary

380 This manuscript provides an overview of data collected by four different RPAS operated during the 2018 LAPSE-  
RATE campaign in the San Luis Valley of Colorado. These included the University of Colorado DataHawk2, Talon  
and TTwistor aircraft, and the Black Swift Technologies S1. In combination, these vehicles collected over 30 flight  
hours of meteorological data between 14-20 July, 2018, covering altitudes between the surface and 915 m AGL. Data  
from these vehicles are available for public download from zenodo.org, and the previous sections document processing  
385 conducted on this dataset before publication, as well as information on the expected accuracy of the sensors deployed  
on these systems. The contributions made by these RPAS and their operating teams to the broader LAPSE-RATE

effort represent a significant component of the measurements obtained to gain understanding on boundary layer processes and phenomena in this high-altitude environment. In combination with surface-based and numerical data, these data are currently being used to evaluate a variety of scientific hypotheses related to the primary measurement objectives of LAPSE-RATE.

#### Author Contributions

GB was the PI for LAPSE-RATE and lead organization of the field campaign. Additionally, he processed data for the DataHawk2, Talon and TTwistor aircraft, and was the primary author of the current manuscript. C.D., S.B., S.S., R.L., K.G., J.E. and M.S. assisted with the processing of the datafiles described in this manuscript. C.D., S.B., D.L., J.E., D.H., M.S., R.L., S.S., C.C., A.D., A.S., K.G., Z.L. and F.Q. were involved with field operation of the aircraft and data processing during LAPSE-RATE, with D.H. serving as chief pilot for the University of Colorado operations. B.A. and E.F. were the PIs for the Talon and TTwistor aircraft deployed during LAPSE-RATE, while D.L. was the PI for the DataHawk2. All authors contributed to the review and development of the manuscript.

#### Acknowledgements

General support for salary and overhead associated with the collection of these datasets was provided by the NOAA Physical Sciences Laboratory, the University of Colorado's Integrated Remote and In-Situ Sensing (IRISS) grand challenge project, and Black Swift Technologies. We would additionally like to recognize financial support for student participation and travel from the National Science Foundation (NSF AGS 1807199) and the US Department of Energy (DE-SC0018985). General support for the LAPSE-RATE campaign was provided by the International Society for Atmospheric Research using Remotely-piloted Aircraft (ISARRA).

#### References

- Balsley, B.B., Lawrence, D.A., Fritts, D.C., Wang, L., Wan, K., and Werne, J.: Fine Structure, Instabilities, and Turbulence in the Lower Atmosphere: High-Resolution In Situ Slant-Path Measurements with the DataHawk UAV and Comparisons with Numerical Modeling. *J. Atmos. Oceanic Technol.*, **35**, 619–642, <https://doi.org/10.1175/JTECH-D-16-0037.1>, 2018.
- Barbieri, L., Kral, S.T., Bailey, S.C.C., Frazier, A.E., Jacob, J.D., Reuder, J., Brus, D., Chilson, P.B., Crick, C., Detweiler, C., Doddi, A., Elston, J., Foroutan, H., González-Rocha, J., Greene, B.R., Guzman, M.I., Houston, A.L., Islam, A., Kemppinen, O., Lawrence, D., Pillar-Little, E.A., Ross, S.D., Sama, M.P., Schmale, D.G., Schuyler, T.J., Shankar, A., Smith, S.W., Waugh, S., Dixon, C., Borenstein, S., de Boer, G. Intercomparison of Small Unmanned Aircraft System (sUAS) Measurements for Atmospheric Science during the LAPSE-RATE Campaign. *Sensors*, **19**, 2179, doi:10.3390/s19092179, 2019.

Cassano, J. J., Seefeldt, M. W., Palo, S., Knuth, S. L., Bradley, A. C., Herrman, P. D., Kernebone, P. A., and Logan, N. J.: Observations of the atmosphere and surface state over Terra Nova Bay, Antarctica, using unmanned aerial systems, *Earth Syst. Sci. Data*, 8, 115–126, <https://doi.org/10.5194/essd-8-115-2016>, 2016.

425 Cassano, JJ: Observations of atmospheric boundary layer temperature profiles with a small unmanned aerial vehicle. *Antarct. Sci.* Version: 1, **26**, 205-213, doi: 10.1017/S0954102013000539, 2014.

Cione, J.J., Bryan, G. H., Dobosy, R., Zhang, J.A., de Boer, G., Aksoy, A., Wadler, J.B., Kalina, E.A., Dahl, B.A., Ryan, K., Dumas, E., Marks, F.D., Farber, A.M. and Chen, X.: Eye of the storm: Observing hurricanes with a small unmanned aircraft system, *Bull. Amer. Meteor. Soc.*, <https://doi.org/10.1175/BAMS-D-19-0169.1>, 2019.

430 de Boer, G., Palo, S., Argrow, B., LoDolce, G., Mack, J., Gao, R.-S., Telg, H., Trussel, C., Fromm, J., Long, C. N., Bland, G., Maslanik, J., Schmid, B., and Hock, T.: The Pilatus unmanned aircraft system for lower atmospheric research, *Atmos. Meas. Tech.*, 9, 1845–1857, <https://doi.org/10.5194/amt-9-1845-2016>, 2016.

de Boer, G., Ivey, M.D., Schmid, B., Lawrence, D. Dexheimer, D., Mei, F., Hubbe, J., Hardesty, J.O.E., Bendure, A., Shupe, M.D., McComiskey, A., Telg, H., Schmitt, C., Matrosov, S., Brooks, I., Creamean, J.M., Solomon, A., Turner, D.D., Williams, C., Maahn, M., Argrow, B., Palo, S., Long, C.N., Gao, R.-S. and Mather, J.: A Bird’s Eye View: Development of an Operational ARM Unmanned Aerial Systems Capability for Atmospheric Research in Arctic Alaska, *Bull. Amer. Meteor. Soc.*, **99**, 1197-1212, <https://doi.org/10.1175/BAMS-D-17-0156.1>, 2018.

435 de Boer, G., Argrow, B., Cassano, J., Cione, J., Frew, E., Lawrence, D., Wick, G. and Wolff, C.: Advancing unmanned aerial capabilities for atmospheric research, *Bull. Amer. Meteor. Soc.*, **100**, ES105-ES108, <https://doi.org/10.1175/BAMS-D-18-0254.1>, 2019a.

440 de Boer, G., Dexheimer, D., Mei, F., Hubbe, J., Longbottom, C., Carroll, P. J., Apple, M., Goldberger, L., Oaks, D., Lapierre, J., Crume, M., Bernard, N., Shupe, M. D., Solomon, A., Intrieri, J., Lawrence, D., Doddi, A., Holdridge, D. J., Hubbell, M., Ivey, M. D., and Schmid, B.: Atmospheric observations made at Oliktok Point, Alaska, as part of the Profiling at Oliktok Point to Enhance YOPP Experiments (POPEYE) campaign, *Earth Syst. Sci. Data*, **11**, 1349–1362, <https://doi.org/10.5194/essd-11-1349-2019>, 2019b.

445 de Boer, G., Osborn, J., Cox, C., Intrieri, J., Borenstein, S., Dixon, C. and Foscue G.: miniFlux data from Stratified Ocean Dynamics of the Arctic (SODA) campaign, Beaufort Sea and northern Alaska, 2018. Arctic Data Center. doi:10.18739/A2SJ19R18., 2019c.

de Boer, G., Diehl, C., Jacob, J., Houston, A., Smith, S.W., Chilson, P., Schmale III, D.G., Intrieri, J., Pinto, J., Elston, J., Brus, D., Kemppinen, O., Clark, A., Lawrence, D., Bailey, S.C.C., Sama, M.P., Frazier, A., Crick, C., Natalie, V., Pillar-Little, E.A., Klein, P., Waugh, S., Lundquist, J.K., Barbieri, L., Kral, S.T., Jensen, A.A., Dixon, C., Borenstein, S., Hesselius, D., Human, K., Hall, P., Argrow, B., Thornberry, T., Wright, R. and Kelly, J.T.: Development of community, capabilities and understanding through unmanned aircraft-based atmospheric research: The LAPSE-RATE campaign, *Bull. Amer. Meteor. Soc.*, **101**, E684-E699, <https://doi.org/10.1175/BAMS-D-19-0050.1>, 2020a.

450 de Boer, G., Houston, A., Jacob, J., Chilson, P. B., Smith, S. W., Argrow, B., Lawrence, D., Elston, J., Brus, D., Kemppinen, O., Klein, P., Lundquist, J. K., Waugh, S., Bailey, S. C. C., Frazier, A., Sama, M. P., Crick, C., Schmale III, D., Pinto, J., Pillar-Little, E. A., Natalie, V., and Jensen, A.: Data Generated During the 2018 LAPSE-

Field Code Changed

Field Code Changed

Field Code Changed

460 RATE Campaign: An Introduction and Overview, *Earth Syst. Sci. Data Discuss.*, <https://doi.org/10.5194/essd-2020-98>, accepted for publication, 2020b.

de Boer, G., Lawrence, D. and Doddi, A.: DataHawk2 files from LAPSE-RATE (Version 2.0) [Data set]. Zenodo. <http://doi.org/10.5281/zenodo.3891620>, 2020c.

de Boer, G., Laurence III, R., Swenson, S., Borenstein, S., Dixon, S. and Argrow, B.: Talon files from LAPSE-RATE (Version 3.0) [Data set]. Zenodo, <http://doi.org/10.5281/zenodo.4096451>, 2020d.

465 de Boer, G., Dixon, C., Borenstein, S., Glasheen, K., Hesselius, D., Choate, C.M., Laouar, Z., Quimby, F., Frew, E. and Argrow, B.: TTWISTOR files from LAPSE-RATE (Version 3.0) [Data set]. Zenodo. <http://doi.org/10.5281/zenodo.4110626>, 2020e.

de Boer, G., Waugh, S., Erwin, A., Borenstein, S., Dixon, C., Shanti, W., Houston, A., and Argrow, B.: Measurements from mobile surface vehicles during LAPSE-RATE, *Earth Syst. Sci. Data Discuss.*, <https://doi.org/10.5194/essd-2020-173>, in review, 2020f.

470 Elston, J., Argrow, B., Frew, E., Houston, A. and Straka, J.: Evaluation of Unmanned Aircraft Systems for Severe Storm Sampling using Hardware-in-the-Loop Simulations, *Journal of Aerospace Computing, Information, and Communication*, **8**, 269-294, <https://doi.org/10.2514/1.53737>, 2011a.

Elston, J., Roadman, J., Stachura, M., Argrow, B., Houston, A. and Frew, E.: The Tempest Unmanned Aircraft System for In Situ Observations of Tornadoic Supercells: Design and VORTEX2 Flight Results, *J. Field Robotics*, **28**, 461-483, <https://doi.org/10.1002/rob.20394>, 2011b.

475 Elston, J., Argrow, B., Stachura, M., Weibel, D., Lawrence, D. and Pope, D.: Overview of Small Fixed-Wing Unmanned Aircraft for Meteorological Sampling, *J. Atmos. Ocean. Tech.*, **32**, 97-115, doi: 10.1175/JTECH-D-13-00236.1, 2015.

480 Elston, J. and M. Stachura: Black Swift Technologies S1 Unmanned Aircraft System Observations from LAPSE-RATE (Version 1.1) [Data set]. Zenodo. <http://doi.org/10.5281/zenodo.3861831>, 2020.

Frew, E. W., Elston, J., Argrow, B., Houston, A., and Rasmussen, E.: Sampling Severe Local Storms and Related Phenomena, *IEEE Robotics & Automation Magazine*, **19**, 85-95, [10.1109/MRA.2012.2184193](https://doi.org/10.1109/MRA.2012.2184193), 2012.

485 Houston, A.L., Argrow, B., Elston, J., Lahowetz, J., Frew, E.W., P.C. Kennedy: The Collaborative Colorado-Nebraska Unmanned Aircraft System Experiment, *Bull. Amer. Meteor. Soc.*, **93**, 39-54, <https://doi.org/10.1175/2011BAMS3073.1>, 2012.

Intrieri, J.M., de Boer, G., Shupe, M.D., Spackman, J.R., Wang, J., Neiman, P.J., Wick, G.A., Hock, T. and Hood, R.E.: Global Hawk dropsonde observations of the Arctic atmosphere during the Winter Storms and Pacific Atmospheric Rivers (WISPAR) campaign, *Atmos. Meas. Tech.*, **7**, 3917-3926, doi: 10.5194/amt-7-3917-2014, 2014.

490 Kantha, L., Lawrence, D., Luce, H., Hashiguchi, H., Tsuda, T., Wilson, R., Mixa, T. and Yabuki, M.: Shigaraki: UAV-Radar Experiment (ShUREX): overview of the campaign with some preliminary results, *Prog. Earth. Planet. Sci.*, **4**, 19, 2017.

**Deleted:** Elston, J., Roadman, J., Stachura, M., Argrow, B., Houston, A. and Frew, E.: The Tempest Unmanned Aircraft System for In Situ Observations of Tornadoic Supercells: Design and VORTEX2 Flight Results, *J. Field Robotics*, **28**, 461-483, <https://doi.org/10.1002/rob.20394>, 2011.

**Deleted:** (2020)

**Deleted:** .

Knuth, S. L., Cassano, J. J., Maslanik, J. A., Herrmann, P. D., Kernebone, P. A., Crocker, R. I., and Logan, N. J.: Unmanned aircraft system measurements of the atmospheric boundary layer over Terra Nova Bay, Antarctica, *Earth Syst. Sci. Data*, **5**, 57–69, <https://doi.org/10.5194/essd-5-57-2013>, 2013.

505 Koch, S.E., Fengler, M., Chilson, P.B., Elmore, K.L., Argrow, B., Andra Jr., D.L. and Lindley, T.: On the Use of Unmanned Aircraft for Sampling Mesoscale Phenomena in the Preconvective Boundary Layer, *J. Atmos. Ocean. Tech.*, **35**, 2265-2288, doi: 10.1175/JTECH-D-18-0101.1, 2018.

[Roadman, J., Elston, J.S., Argrow, B. and Frew, E.: Mission Performance of the Tempest Unmanned Aircraft System in Supercell Storms, \*J. Aircraft\*, \*\*49\*\*, 1821-1830, <https://doi.org/10.2514/1.C031655>, 2012.](#)

510 Scipi3n, D.E., Lawrence, D.A., Milla, M.A., Woodman, R.F., Lume, D.A. and Balsley, B.B.: Simultaneous observations of structure function parameter of refractive index using a high-resolution radar and the DataHawk small airborne measurement system, *Ann. Geophys.*, **34**, 767-780, <https://doi.org/10.5194/angeo-34-767-2016>, 2016.

Swenson, S., Argrow, B., Frew, E., Borenstein, S., Keeler, J. Development and Deployment of Air-Launched Drifters from Small RPAS. *Sensors*, **19**, 2149, <https://doi.org/10.3390/s19092149>, 2019.

515 Van den Kroonenberg, A., Martin, T., Buschmann, M., Bange J. and V3rsmann, P.: Measuring the wind vector using the autonomous mini aerial vehicle M2AV, *J. Atmos. Ocean. Technol.*, **25**, 1969–1982, <https://doi.org/10.1175/2008JTECHA1114.1>, 2008.

Deleted: D.A.

Deleted: M.A.

Deleted: R.F.

Deleted: D.A.

Deleted: B.B.

Formatted: Justified, Indent: Left: 0", Hanging: 0.25", Line spacing: 1.5 lines, Tab stops: 1.63", Left

Deleted: ¶

| Platform                      | Measurement                                         | Sensor                            | Stated Accuracy     |
|-------------------------------|-----------------------------------------------------|-----------------------------------|---------------------|
| <i>CU DataHawk2 [8.84 hr]</i> | Temperature (C)                                     | Sensiron SHT-31                   | +/- 0.2 C (0-90 C)  |
|                               | Relative Humidity (%)                               | Sensiron SHT-31                   | +/- 2% (0-100%)     |
|                               | Pressure (hPa)                                      |                                   |                     |
|                               | Wind Speed (m s <sup>-1</sup> )                     | Multiple                          | Undetermined        |
|                               | Wind Direction (m s <sup>-1</sup> )                 | Multiple                          | Undetermined        |
|                               | Up- and Downward Looking Brightness Temperature (C) | Semitec 10TP583T                  | Undetermined        |
| <i>BST S1 [10.13 hr]</i>      | Temperature (C)                                     | E+E Elektronik EE-03              | +/- 0.3 C (at 20 C) |
|                               | Relative Humidity (%)                               | E+E Elektronik EE-03              | +/- 3% (at 21 C)    |
|                               | Pressure (hPa)                                      | BST MHP                           |                     |
|                               | Wind Speed (m s <sup>-1</sup> )                     | Multiple, including BST MHP       | Undetermined        |
|                               | Wind Direction (m s <sup>-1</sup> )                 | Multiple, including BST MHP       | Undetermined        |
|                               |                                                     |                                   |                     |
| <i>CU Talon [4.2 hr]</i>      | Temperature (C)                                     | Vaisala RSS904                    | 0.2 C               |
|                               | Relative Humidity (%)                               | Vaisala RSS904                    | 2%                  |
|                               | Pressure (hPa)                                      | Vaisala RSS904                    | 0.4 hPa             |
|                               | Wind Speed (m s <sup>-1</sup> )                     | Multiple (from PixHawk autopilot) | Undetermined        |
|                               | Wind Direction (m s <sup>-1</sup> )                 | Multiple (from PixHawk autopilot) | Undetermined        |
|                               |                                                     |                                   |                     |
| <i>CU TTwistor [7.49 hr]</i>  | Temperature (C)                                     | Vaisala RSS904                    | 0.2 C               |
|                               | Relative Humidity (%)                               | Vaisala RSS904                    | 2%                  |
|                               | Pressure (hPa)                                      | Vaisala RSS904                    | 0.4 hPa             |
|                               | Wind Speed (m s <sup>-1</sup> )                     | Multiple, including Aerosonde MHP | Undetermined        |
|                               | Wind Direction (m s <sup>-1</sup> )                 | Multiple, including Aerosonde MHP | Undetermined        |
|                               |                                                     |                                   |                     |

**Table 1:** An overview of the platforms and meteorologically-relevant measurements from each. The total number of campaign flight hours covered by each platform are included in brackets in the first (leftmost) column.

- Deleted: *CU Talon*
- Deleted: Temperature (C)
- Deleted: 0.2 C
- Deleted: Vaisala RSS904
- Deleted: Relative Humidity (%)
- Deleted: Vaisala RSS904
- Deleted: 2%
- Deleted: Pressure (hPa)
- Deleted: Vaisala RSS904
- Deleted: 0.4 hPa
- Deleted: Wind Speed (m s<sup>-1</sup>)
- Deleted: Multiple (from PixHawk autopilot)
- Deleted: Undetermined
- Deleted: Wind Direction (m s<sup>-1</sup>)
- Deleted: Multiple (from PixHawk autopilot)
- Deleted: Undetermined
- Deleted: *CU TTwistor*
- Deleted: Temperature (C)
- Deleted: 0.2 C
- Deleted: Vaisala RSS904
- Deleted: Relative Humidity (%) ... [1]

525

| Variable                        | DataHawk2     | S1  | Talon         | TTwistor      |
|---------------------------------|---------------|-----|---------------|---------------|
| Temperature (C)                 | -50<T<50      | N/A | -50<T<50      | -50<T<50      |
| RH (%)                          | 0<RH<110      | N/A | 0<RH<110      | 0<RH<110      |
| Pressure (hPa)                  | 0<p<1000      | N/A | 0<p<1000      | 0<p<1000      |
| Altitude (m MSL or AGL)         | 0<alt<5000    | N/A | 0<alt<5000    | 0<alt<5000    |
| Latitude (deg)                  | 30<lat<40     | N/A | 30<lat<40     | 30<lat<40     |
| Longitude (deg)                 | -120<lon<-100 | N/A | -120<lon<-100 | -120<lon<-100 |
| u, v (m s <sup>-1</sup> )       | -50<u,v<50    | N/A | -50<u,v<50    | -50<u,v<50    |
| w (m s <sup>-1</sup> )          | -20<w<20      | N/A | -20<w<20      | -20<w<20      |
| Wind Speed (m s <sup>-1</sup> ) | 0<wspd<100    | N/A | 0<wspd<100    | 0<wspd<100    |

550 **Table 2:** Quality control limits applied to the different data b1 datasets. To date, S1 data are only available as a1 level files.

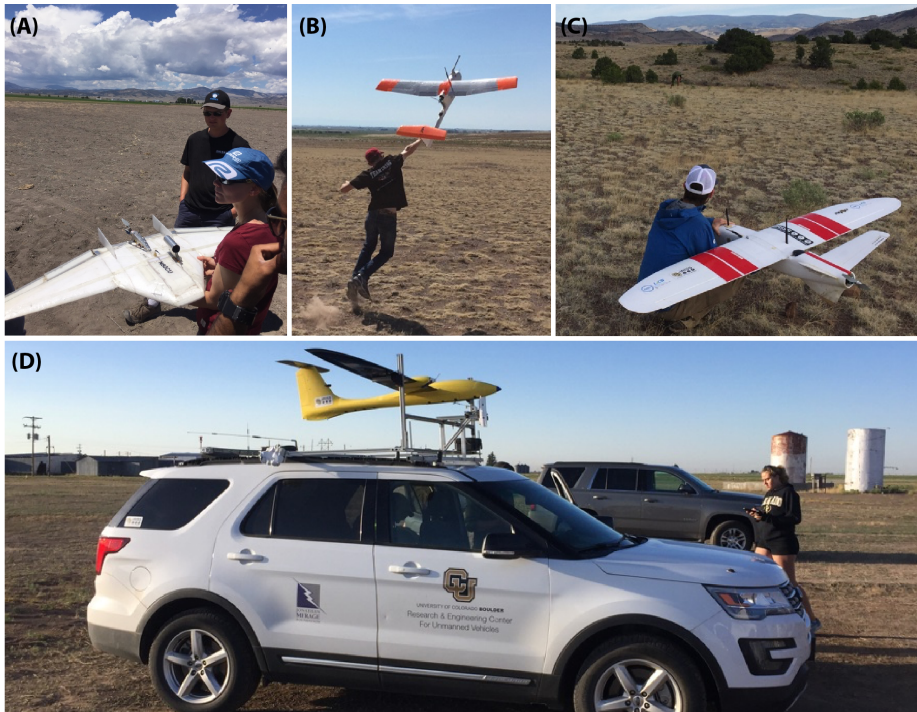

**Figure 1:** The aircraft used to collect the datasets described in this manuscript. Clockwise from top left: The CU DataHawk2, the BST S1, the CU Talon, and the CU TTwistor mounted on top of a tracker vehicle for launch prior to “follow me” operations.

555

Deleted: <object>



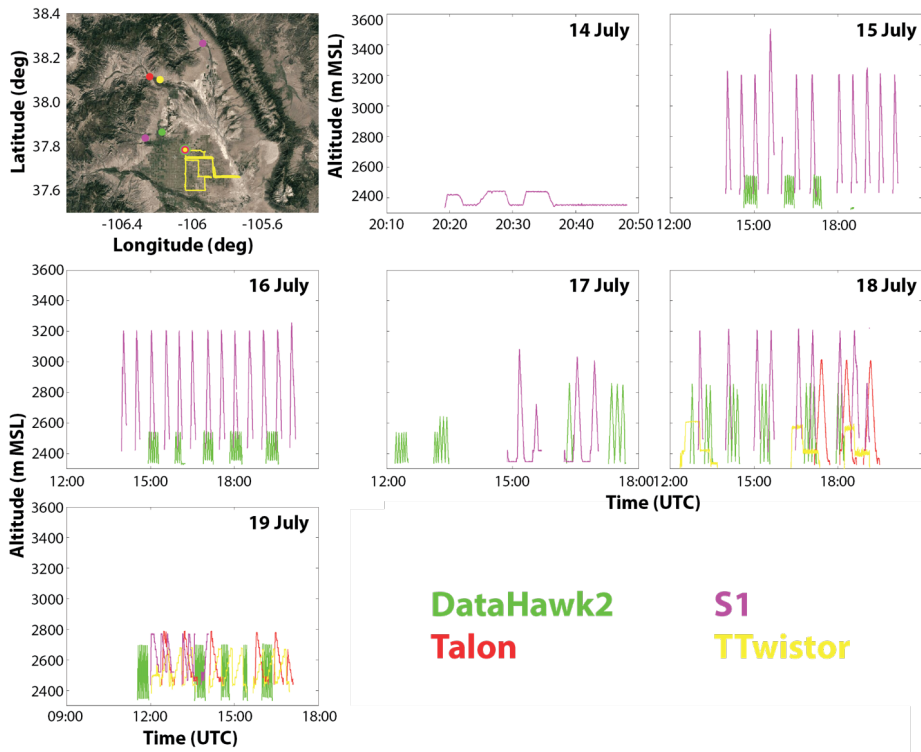

560 **Figure 2:** The flight locations for each aircraft (left) and altitudes covered by the different aircraft broken down by day (right). Map background is from © Google Maps, downloaded through their API.

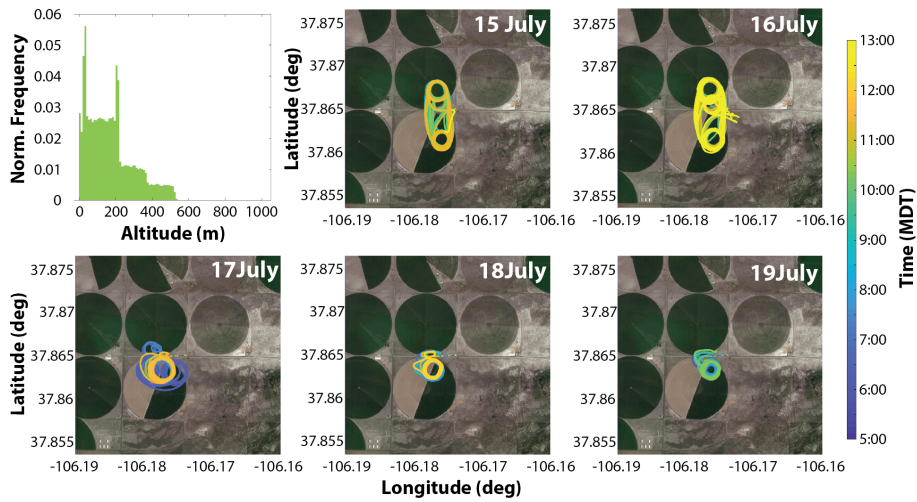

565 **Figure 3:** A histogram of altitudes covered during LAPSE-RATE by the DataHawk2 (top left), along with the flight patterns covered by this aircraft during individual days of the campaign. See the map in Figure 2 for additional details on flight location. Map backgrounds are from © Google Maps, downloaded through their API.

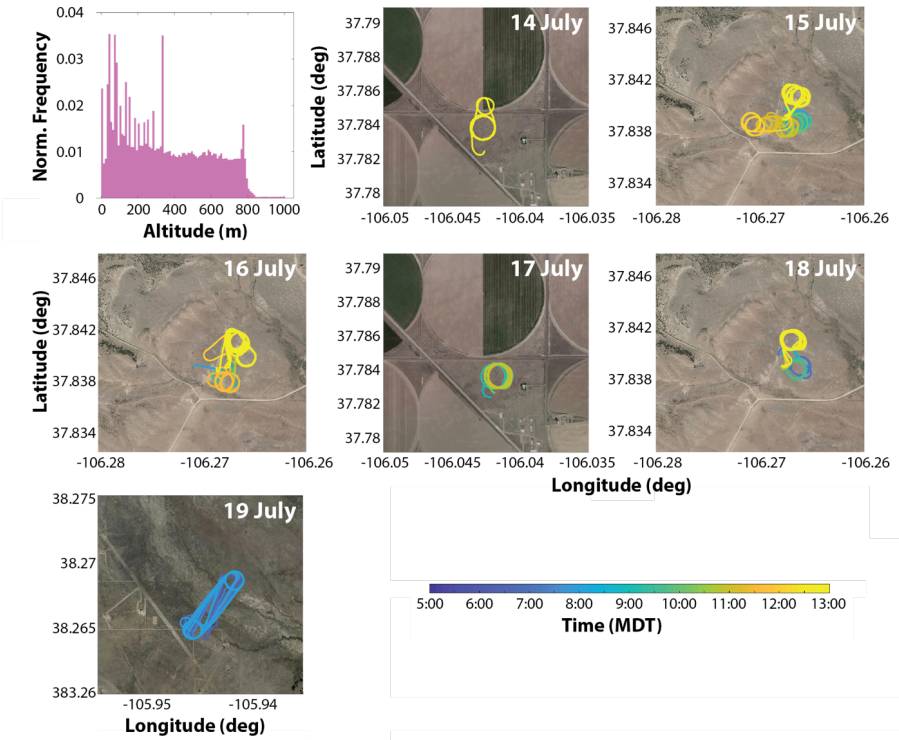

570

**Figure 4:** A histogram of altitudes covered during LAPSE-RATE by the S1 (left), along with the flight patterns covered by this aircraft during individual days of the campaign. See the map in Figure 2 for additional details on flight locations. Map backgrounds are from © Google Maps, downloaded through their API.

575

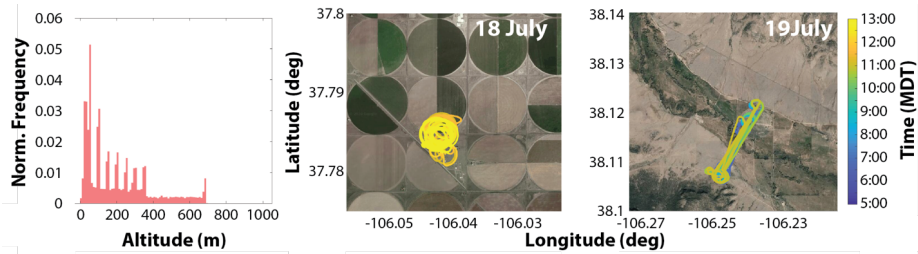

**Figure 5:** A histogram of altitudes covered during LAPSE-RATE by the Talon (left), along with the flight patterns covered by this aircraft during individual days of the campaign. See the map in Figure 2 for additional details on flight locations. Map backgrounds are from © Google Maps, downloaded through their API.

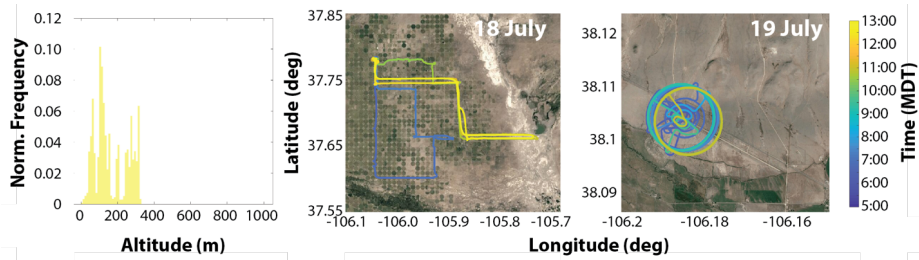

**Figure 6:** A histogram of altitudes covered during LAPSE-RATE by the TTwistor (left), along with the flight patterns covered by this aircraft during individual days of the campaign. See the map in Figure 2 for additional details on flight locations. Map backgrounds are from © Google Maps, downloaded through their API.

585

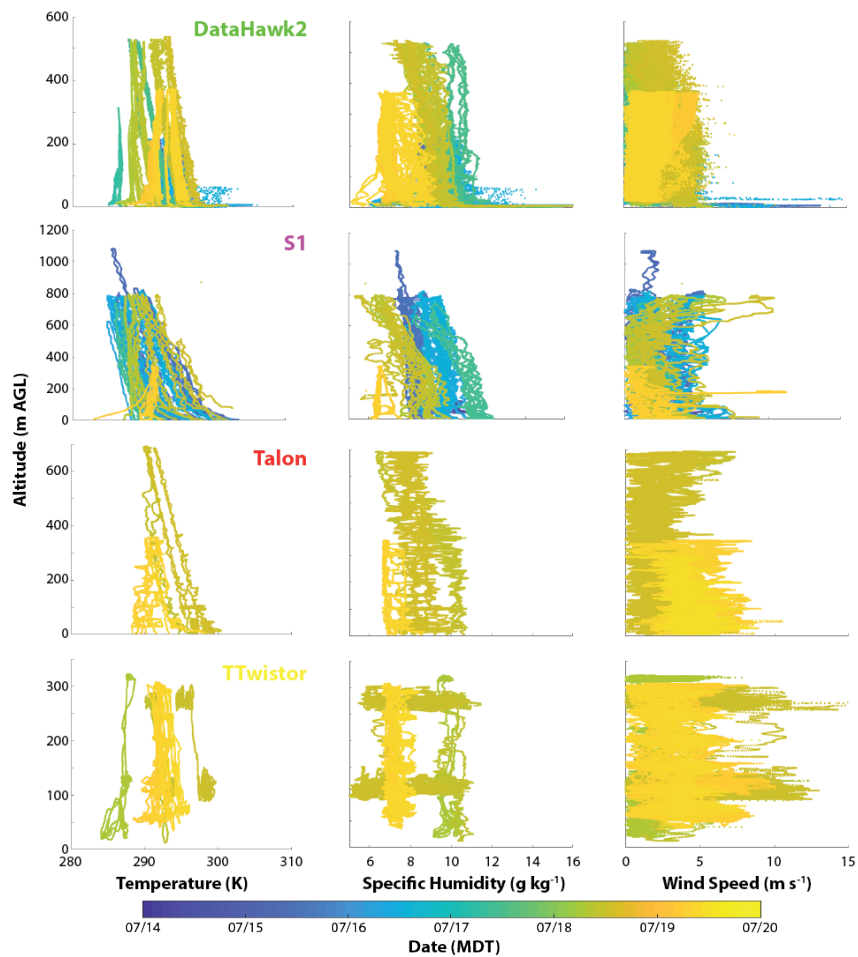

**Figure 7:** Profiles of (left to right) temperature, specific humidity and wind speed from the DataHawk2, S1, Talon and TTwistor (top to bottom). Colors indicate the date of flight. Please note that the altitudes are shown as “above ground level” (AGL), and some aircraft were operating at different locations each day and from one another, meaning that the ground levels in this figure represent different elevations relative to sea level.

590
